# Supplementary material
Source: publisher figshare collection journal article supplement (https://acs.figshare.com/ndownloader/files/16335557)

# Supporting Information

**Manuscript Title:** Sustained Intracellular Raltegravir Depots Generated with Prodrugs Designed for Nanoparticle Delivery

**Manuscript Authors:** Rachel L. Creighton<sup>1</sup>, Ian T. Suydam<sup>1,2</sup>, Mikaela E. Ebner<sup>2</sup>, Wilma E. Afunugo<sup>2</sup>, Alaina M. Bever<sup>2</sup>, Shijie Cao<sup>1</sup>, Yonghou Jiang<sup>1</sup> and Kim A. Woodrow<sup>1\*</sup>

**Corresponding author email address:** [woodrow@uw.edu](mailto:woodrow@uw.edu)

## **Author Affiliations:**

<sup>1</sup>Department of Bioengineering, University of Washington, 3720 15th Ave NE, Seattle, WA 98195-5061, USA

<sup>2</sup>Department of Chemistry, Seattle University, 901 12th Ave, Seattle, WA 98122, USA

## **Supporting Information Content:**

- 19 pages
- Synthetic procedures and characterization for RAL and analogs **1–7**.
- Table S1
- Figures S1 – S16

**Table S1.** Properties of ARV loaded PLGA-NP containing RAL and analogs **1** – **4** and **7**.

| Compound                                       | RAL         | <b>1</b>    | <b>2</b>    | <b>3</b>    | <b>4</b>    | <b>7</b>    |
|------------------------------------------------|-------------|-------------|-------------|-------------|-------------|-------------|
| ARV M.W.<br>(g/mol)                            | 444.42      | 486.46      | 528.21      | 570.62      | 548.18      | 560.20      |
| NP diameter <sup>a</sup><br>(nm)               | 317 ± 35    | 267 ± 6     | 263 ± 7     | 357 ± 1     | 257 ± 44    | 301 ± 12    |
| polydispersity<br>index <sup>a</sup>           | 0.17 ± 0.10 | 0.08 ± 0.01 | 0.11 ± 0.01 | 0.28 ± 0.05 | 0.12 ± 0.02 | 0.14 ± 0.01 |
| zeta-potential <sup>a</sup><br>(mV, pH 7)      | −24.2 ± 1.6 | −24.5 ± 0.9 | −23.5 ± 2.2 | −22.4 ± 0.4 | −21.3 ± 1.8 | −19.1 ± 0.6 |
| drug loading <sup>a,b</sup><br>(wt %)          | 0.30 ± 0.02 | 0.10 ± 0.01 | 1.2 ± 0.1   | 6.9 ± 0.1   | 7.7 ± 0.2   | 0.40 ± 0.04 |
| encapsulation<br>efficiency <sup>a,b</sup> (%) | 3.0 ± 0.2   | 1.0 ± 0.1   | 12. ± 1     | 69. ± 1     | 77. ± 2     | 4.0 ± 0.4   |

<sup>a</sup>Measured properties are reported as the mean ± SD from replicates including a minimum of two independent nanoparticle fabrications. <sup>b</sup>Drug loading and encapsulation efficiency were calculated as follows.

$$\text{drug loading} = \left( \frac{\text{mass of drug detected in ARV - NP}}{\text{mass of ARV - NP}} \right) \cdot 100$$

$$\text{encapsulation efficiency} = \left( \frac{\text{observed drug loading}}{\text{theoretical drug loading}} \right) \cdot 100$$

**Methods and Materials:**

Reaction solvents were commercially available anhydrous grade and used without further purification. Synthetic glassware was oven-dried before use and reactions were conducted under a N<sub>2</sub>(g) atmosphere with magnetic stirring. TLC was performed on EMD 60G silica gel (SiO<sub>2</sub>) plates and visualized with 254 nm UV light. NMR spectra were recorded on a Bruker 400 MHz Avance III instrument with chemical shift values referenced to the residual solvent peak of DMSO-*d*<sub>6</sub>. Mass spectra were recorded on a Bruker Esquire ion trap mass spectrometer and measured in positive ion mode following electrospray ionization. Reversed-phase HPLC analysis was carried out on an Agilent 1100 series instrument using a Phenomenex Luna 5.0 μm C-18 column (250 x 4.6 mm). The reported yields are for isolated compounds of >95% purity as assessed by <sup>1</sup>H NMR and were not optimized.

**Experimental Procedures:**

Detailed reaction conditions, purification techniques and characterization data are provided for RAL and analogs **1–7** below.

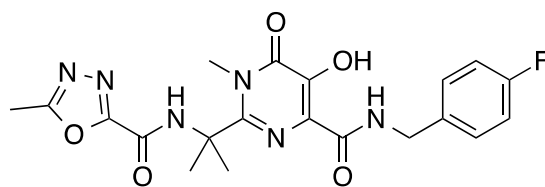

**RAL**

Chemical Formula:  $C_{20}H_{21}FN_6O_5$

Exact Mass: 444.16

Molecular Weight: 444.42

***N*-[(4-Fluorophenyl)methyl]-1,6-dihydro-5-hydroxy-1-methyl-2-[(1-methyl-1-[(5-methyl-1,3,4-oxadiazol-2-yl)carbonyl]amino]ethyl)-6-oxo-4-pyrimidinecarboxamide (Raltegravir).**

Raltegravir was isolated as a neutral compound from ISENTRESS® tablets (400 mg per tablet, Merck & Co.). Four crushed tablets were stirred in dichloromethane (200 mL) containing acetic acid (4 mL) for 24 h at room temperature. The resulting slurry was filtered through a bed of celite and the filtrate was extracted with 0.5 M NaOH (3 x 100 mL). The aqueous layer was washed with dichloromethane (2 x 75 mL) and adjusted to pH 2 by the dropwise addition of 5.0 M HCl at 0 °C. The resulting suspension was extracted with dichloromethane (3 x 100 mL), dried ( $MgSO_4$ ) and concentrated under reduced pressure. Recrystallization of the crude material from isopropanol (75 °C → 25 °C, overnight) provided raltegravir as a white solid (0.885 g, 55% recovery).  $R_f$  = 0.33 (10:90 MeOH:CH<sub>2</sub>Cl<sub>2</sub>). <sup>1</sup>H NMR (400 MHz, DMSO-*d*<sub>6</sub>) δ 12.23 (s, 1H), 9.88 (s, 1H), 9.10 (t, *J* = 6.5 Hz, 1H), 7.39 (dd, *J* = 8.6, 5.6 Hz, 2H), 7.17 (t, *J* = 8.9 Hz, 2H), 4.51 (d, *J* = 6.4 Hz, 2H), 3.48 (s, 3H), 2.56 (s, 3H), 1.74 (s, 6H). <sup>13</sup>C NMR (101 MHz, DMSO-*d*<sub>6</sub>) δ 168.4, 165.7, 161.3 (d, *J*<sub>F,C</sub> = 242.5 Hz), 158.6, 158.1, 152.6, 151.8, 145.7, 134.9 (d, *J*<sub>F,C</sub> = 3.0 Hz), 129.5 (d, *J*<sub>F,C</sub> = 8.2 Hz), 124.4, 115.2 (d, *J*<sub>F,C</sub> = 21.4 Hz), 57.6, 41.7, 33.0, 27.0, 10.7. <sup>19</sup>F NMR (376 MHz, DMSO) δ -115.7. MS *m/z* 467.6 (M + Na)<sup>+</sup>.

**Figure S1.** Electrospray mass spectrum of purified RAL acquired in positive-ion mode.

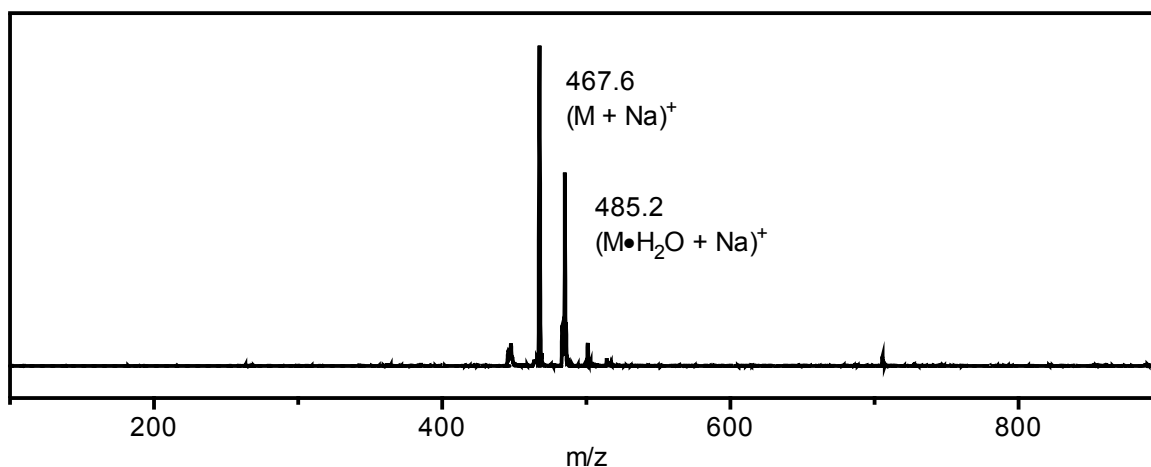

**Figure S2.**  $^1\text{H}$  NMR (400 MHz) and  $^{13}\text{C}$  NMR (101 MHz) of purified RAL in  $\text{DMSO-}d_6$ .

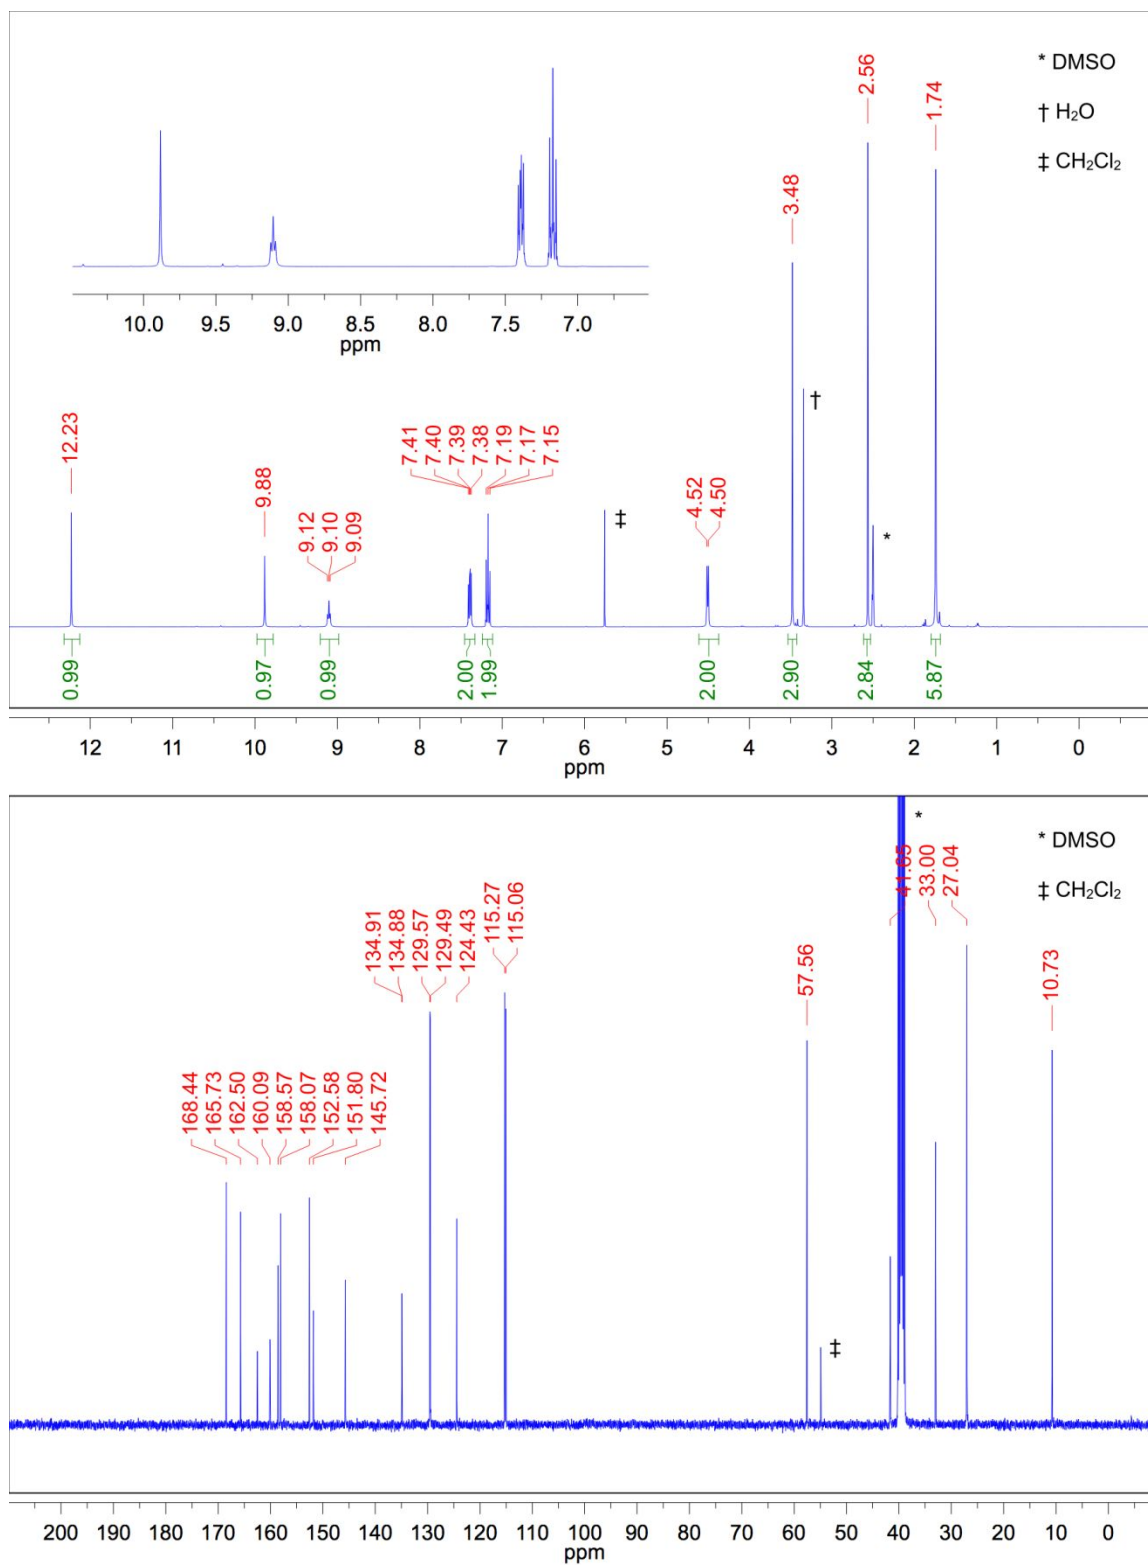

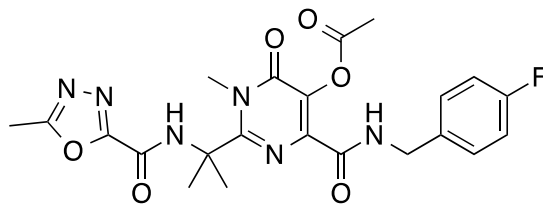

**1**

Chemical Formula:  $C_{22}H_{23}FN_6O_6$

Exact Mass: 486.17

Molecular Weight: 486.46

**5-(Acetyloxy)-N-[(4-fluorophenyl)methyl]-1,6-dihydro-1-methyl-2-(1-methyl-1-[(5-methyl-1,3,4-oxadiazol-2-yl)carbonyl]amino)ethyl)-6-oxo-4-pyrimidinecarboxamide (1).** Acetyl chloride (0.048 mL, 0.68 mmol, 1.5 equiv) was added dropwise to a solution of raltegravir (0.200 g, 0.45 mmol) and triethylamine (0.176 mL, 1.26 mmol, 2.8 equiv) in dichloromethane (3.0 mL) and stirred at room temperature. After 3 h the reaction was diluted with dichloromethane (20 mL), washed with saturated aq.  $NaHCO_3$  (1 x 25 mL) and brine (1 x 25 mL), dried ( $MgSO_4$ ) and concentrated under reduced pressure. The resulting residue was purified by column chromatography on silica gel (3:2 acetone:hexanes) to provide compound **1** as a white solid (0.061 g, 27.9 % yield).  $R_f$  = 0.19 (ethyl acetate).  $^1H$  NMR (400 MHz,  $DMSO-d_6$ )  $\delta$  10.02 (s, 1H), 8.93 (t,  $J$  = 6.4 Hz, 1H), 7.35 (dd,  $J$  = 8.6, 5.7 Hz, 2H), 7.16 (t,  $J$  = 8.9 Hz, 2H), 4.43 (d,  $J$  = 6.3 Hz, 2H), 3.51 (s, 3H), 2.57 (s, 3H), 2.23 (s, 3H), 1.77 (s, 6H).  $^{13}C$  NMR (101 MHz,  $DMSO-d_6$ )  $\delta$  167.8, 165.8, 161.9, 161.2 (d,  $J_{F,C}$  = 242.3 Hz), 159.2, 158.9, 157.9, 152.7, 140.4, 135.4 (d,  $J_{F,C}$  = 3.0 Hz), 133.8, 129.2 (d,  $J_{F,C}$  = 8.2 Hz), 115.1 (d,  $J_{F,C}$  = 21.3 Hz), 57.9, 41.5, 33.2, 26.7, 20.4, 10.7.  $^{19}F$  NMR (376 MHz,  $DMSO$ )  $\delta$  -116.0. MS  $m/z$  509.5 ( $M + Na$ ) $^+$ .

**Figure S3.** Electrospray mass spectrum of **1** acquired in positive-ion mode.

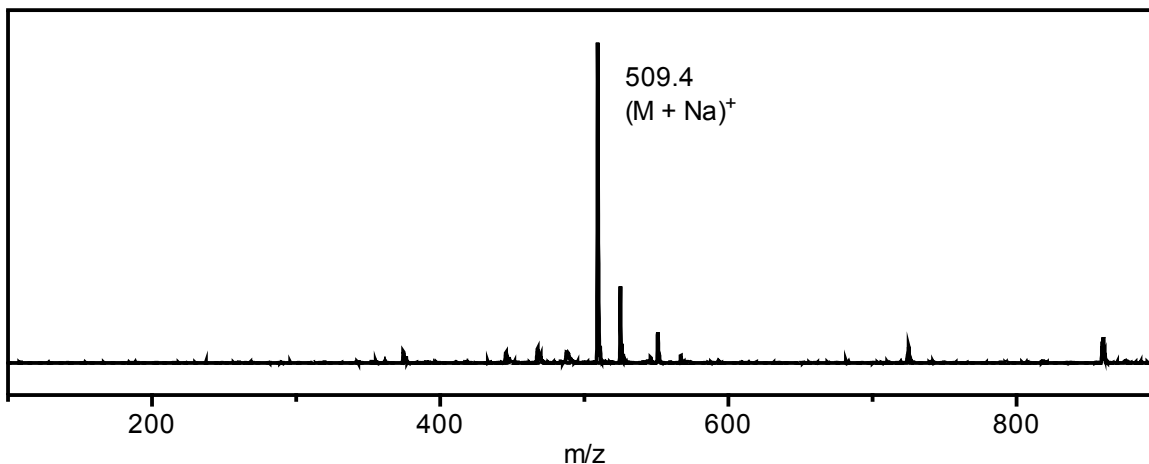

**Figure S4.**  $^1\text{H}$  NMR (400 MHz) and  $^{13}\text{C}$  NMR (101 MHz) of **1** in  $\text{DMSO-}d_6$ .

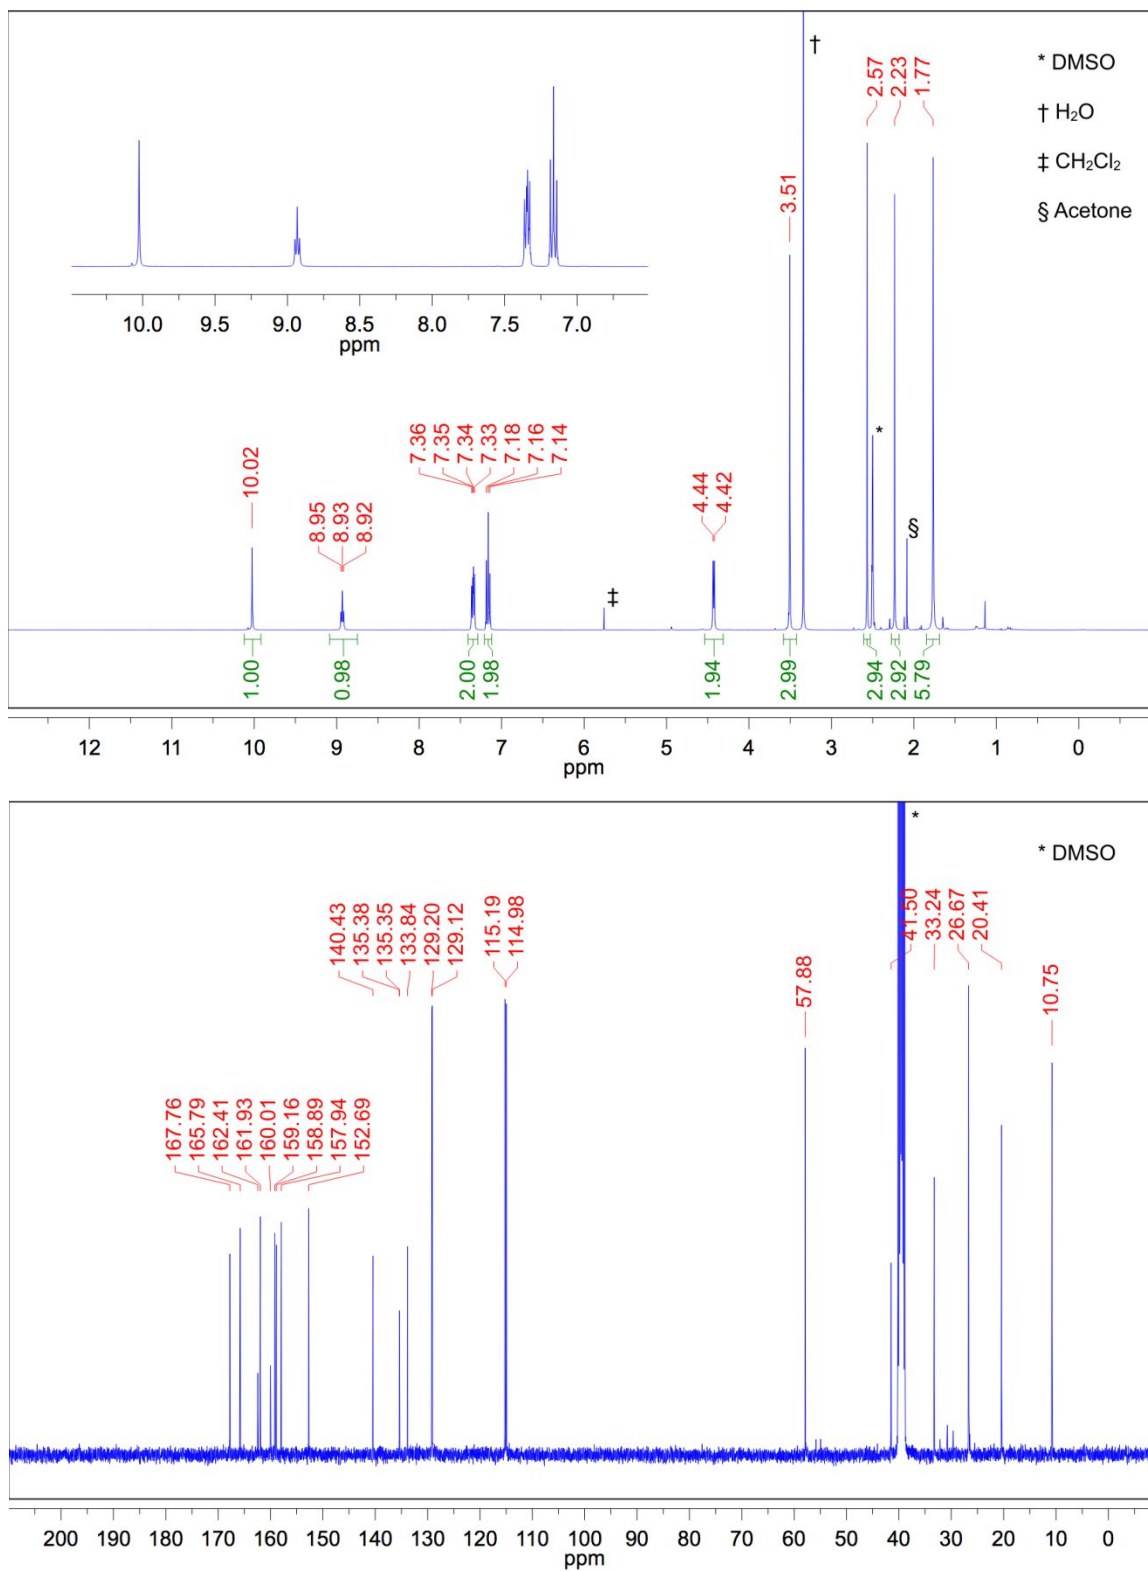

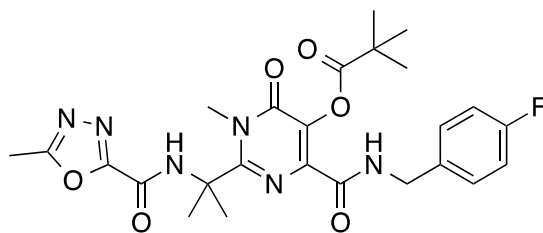

**2**

Chemical Formula:  $C_{25}H_{29}FN_6O_6$

Exact Mass: 528.21

Molecular Weight: 528.54

***N*-[4-Fluorophenyl)methyl]-1,6-dihydro-1-methyl-2-(1-methyl-1-[(5-methyl-1,3,4-oxadiazol-2-yl)carbonyl]amino}ethyl)-5-(2,2-dimethyl-propanoyloxy)-6-oxo-4-pyrimidinecarboxamide (2).** Pivaloyl chloride (0.083 mL, 0.68 mmol, 1.5 equiv) was added dropwise to a solution of raltegravir (0.200 g, 0.45 mmol) and triethylamine (0.176 mL, 1.26 mmol, 2.8 equiv) in dichloromethane (3.0 mL) and stirred at room temperature. After 3 h the reaction was diluted with dichloromethane (20 mL), washed with saturated aq.  $NaHCO_3$  (1 x 25 mL) and brine (1 x 25 mL), dried ( $MgSO_4$ ) and concentrated under reduced pressure. The resulting residue was purified by column chromatography on silica gel (ethyl acetate) to provide compound **2** as a white solid (0.152 g, 63.6 % yield).  $R_f$  = 0.33 (ethyl acetate).  $^1H$  NMR (400 MHz,  $DMSO-d_6$ )  $\delta$  10.05 (s, 1H), 8.93 (t,  $J$  = 6.4 Hz, 1H), 7.38 (dd,  $J$  = 8.7, 5.5 Hz, 2H), 7.19 (t,  $J$  = 8.9 Hz, 2H), 4.46 (d,  $J$  = 6.3 Hz, 2H), 3.54 (s, 3H), 2.61 (s, 3H), 1.80 (s, 6H), 1.29 (s, 9H).  $^{13}C$  NMR (101 MHz,  $DMSO-d_6$ )  $\delta$  174.6, 165.8, 162.0, 161.2 (d,  $J_{F,C}$  = 242.3 Hz), 159.0, 158.7, 158.0, 152.7, 141.0, 135.4 (d,  $J_{F,C}$  = 3.0 Hz), 133.9, 129.2 (d,  $J_{F,C}$  = 8.1 Hz), 115.0 (d,  $J_{F,C}$  = 21.2 Hz), 57.9, 41.5, 38.4, 33.1, 26.8, 26.7, 10.8.  $^{19}F$  NMR (376 MHz,  $DMSO$ )  $\delta$  -116.1. MS  $m/z$  551.4 ( $M + Na$ ) $^+$ .

**Figure S5.** Electrospray mass spectrum of **2** acquired in positive-ion mode.

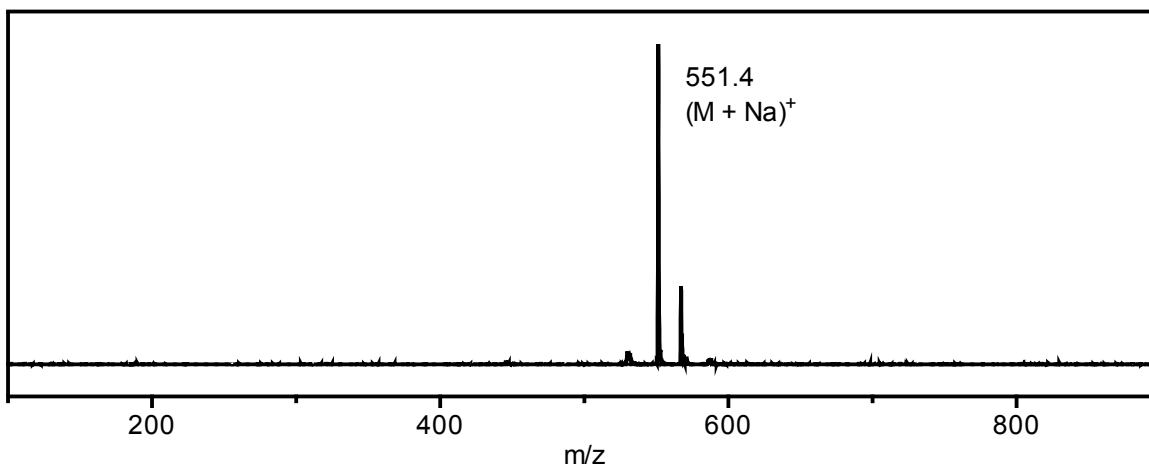



**Figure S6.**  $^1\text{H}$  NMR (400 MHz) and  $^{13}\text{C}$  NMR (101 MHz) of **2** in  $\text{DMSO}-d_6$ .

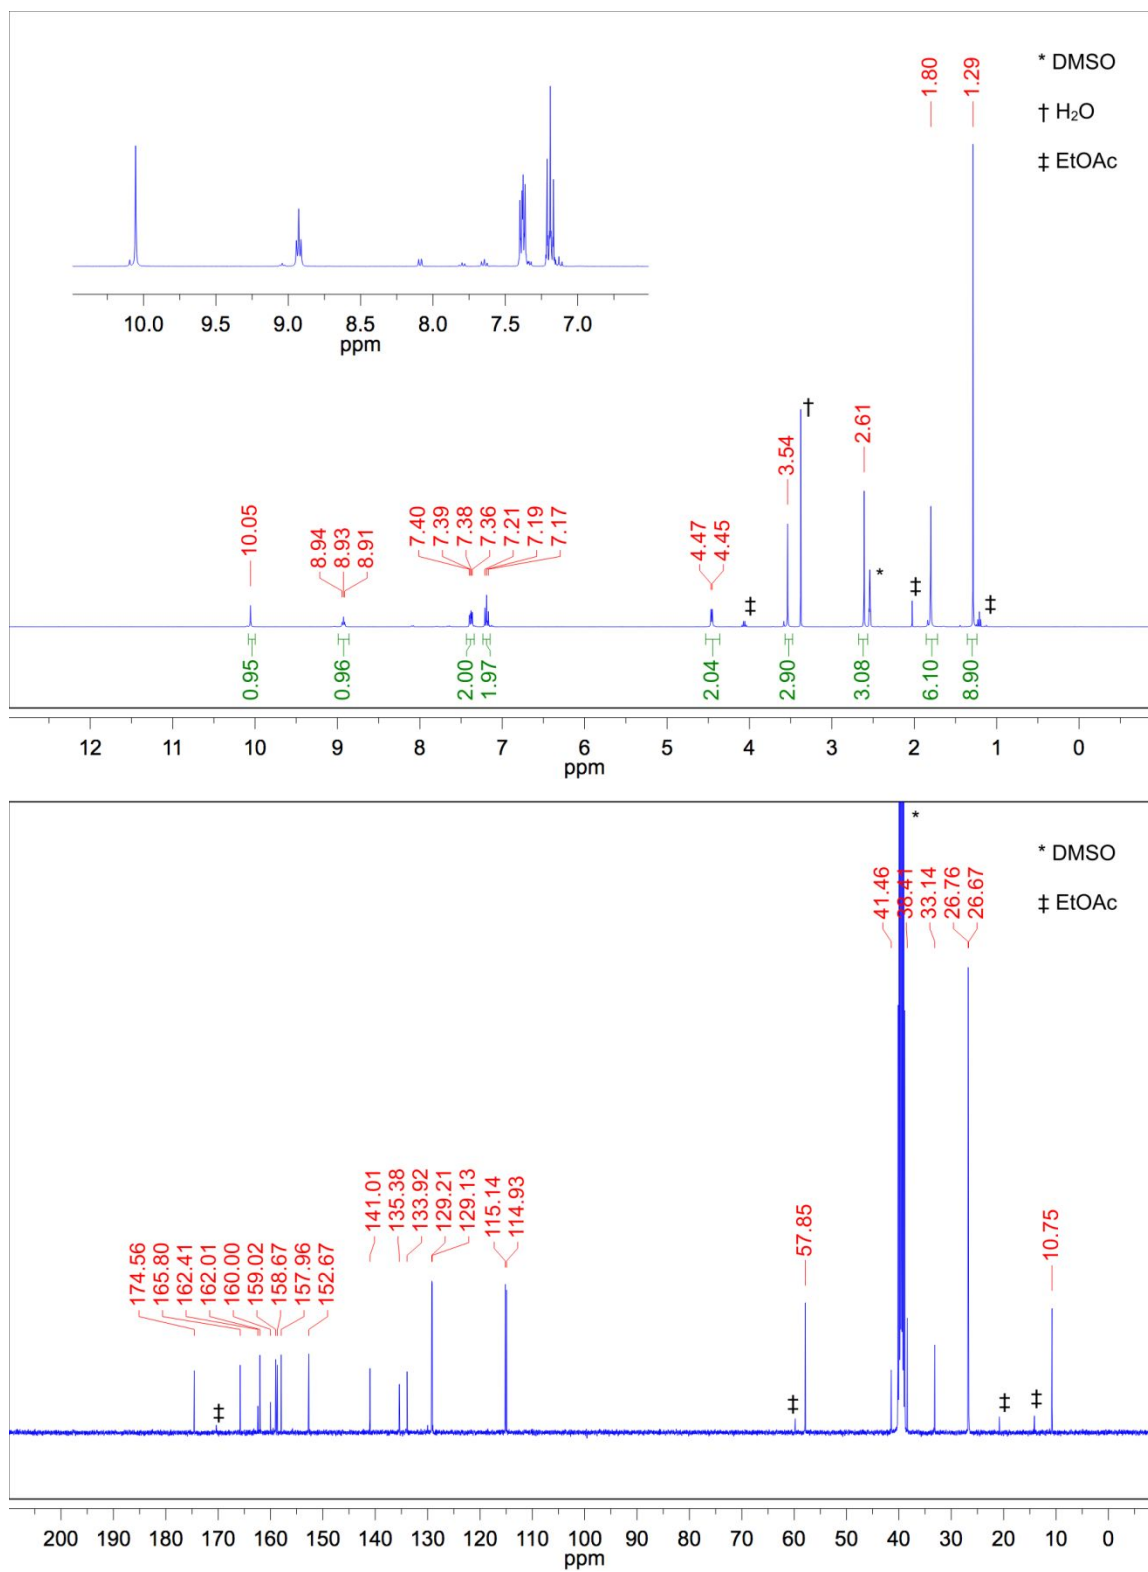

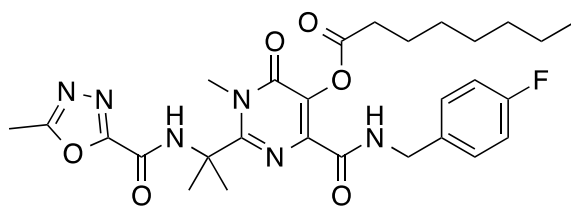

**3**

Chemical Formula:  $C_{28}H_{35}FN_6O_6$

Exact Mass: 570.26

Molecular Weight: 570.62

***N*-[(4-Fluorophenyl)methyl]-1,6-dihydro-1-methyl-2-(1-methyl-1-[(5-methyl-1,3,4-oxadiazol-2-yl)carbonyl]amino)ethyl)-5-(octanoyloxy)-6-oxo-4-pyrimidinecarboxamide**

**(3).** Octanoyl chloride (0.115 mL, 0.68 mmol, 1.5 equiv) was added dropwise to a solution of raltegravir (0.200 g, 0.45 mmol) and triethylamine (0.176 mL, 1.26 mmol, 2.8 equiv) in dichloromethane (3.0 mL) and stirred at room temperature. After 3 h the reaction was diluted with dichloromethane (20 mL), washed with saturated aq.  $NaHCO_3$  (1 x 25 mL) and brine (1 x 25 mL), dried ( $MgSO_4$ ) and concentrated under reduced pressure. The resulting residue was purified by column chromatography on silica gel (ethyl acetate) to provide compound **3** as a white solid (0.123 g, 47.9 % yield).  $R_f$  = 0.35 (ethyl acetate).  $^1H$  NMR (400 MHz,  $DMSO-d_6$ )  $\delta$  10.02 (s, 1H), 8.92 (t,  $J$  = 6.4 Hz, 1H), 7.34 (dd,  $J$  = 8.6, 5.6 Hz, 2H), 7.15 (t,  $J$  = 8.9 Hz, 2H), 4.42 (d,  $J$  = 6.3 Hz, 2H), 3.50 (s, 3H), 2.57 (s, 3H), 2.51 (t,  $J$  = 7.5 Hz, 2H), 1.76 (s, 6H), 1.62 – 1.54 (m, 2H), 1.37 – 1.21 (m, 8H), 0.85 (t, 3H).  $^{13}C$  NMR (101 MHz,  $DMSO-d_6$ )  $\delta$  170.3, 165.8, 162.0, 161.2 (d,  $J_{F,C}$  = 242.1 Hz), 159.1, 158.8, 157.9, 152.7, 140.7, 135.4 (d,  $J_{F,C}$  = 2.9 Hz), 133.8, 129.1 (d,  $J_{F,C}$  = 8.1 Hz), 115.0 (d,  $J_{F,C}$  = 21.3 Hz), 57.9, 41.5, 33.2, 33.1, 31.2, 28.4, 28.2, 26.7, 24.2, 22.1, 14.0, 10.7.  $^{19}F$  NMR (376 MHz,  $DMSO$ )  $\delta$  -116.1. MS  $m/z$  593.5 ( $M + Na$ ) $^+$ .

**Figure S7.** Electrospray mass spectrum of **3** acquired in positive-ion mode.

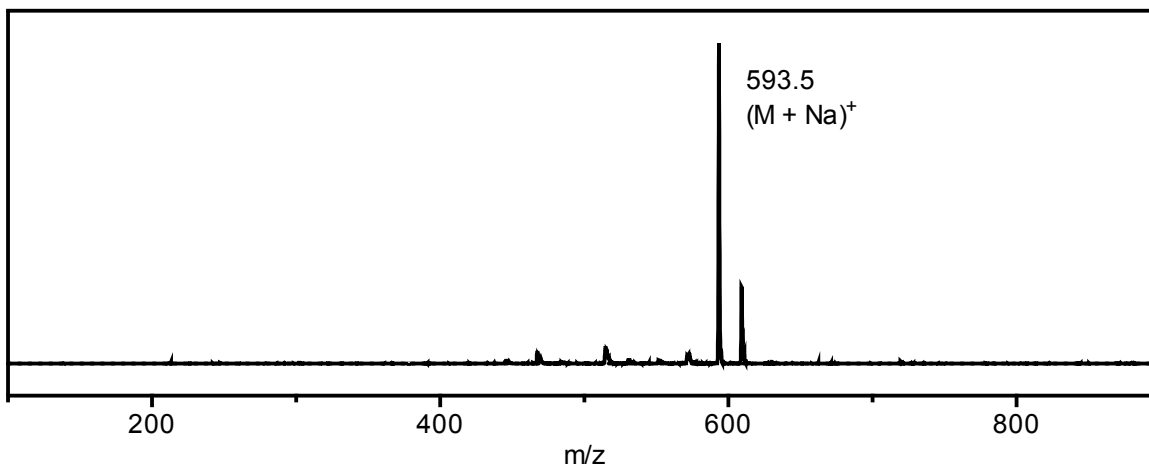

**Figure S8.**  $^1\text{H}$  NMR (400 MHz) and  $^{13}\text{C}$  NMR (101 MHz) of **3** in  $\text{DMSO-}d_6$ .

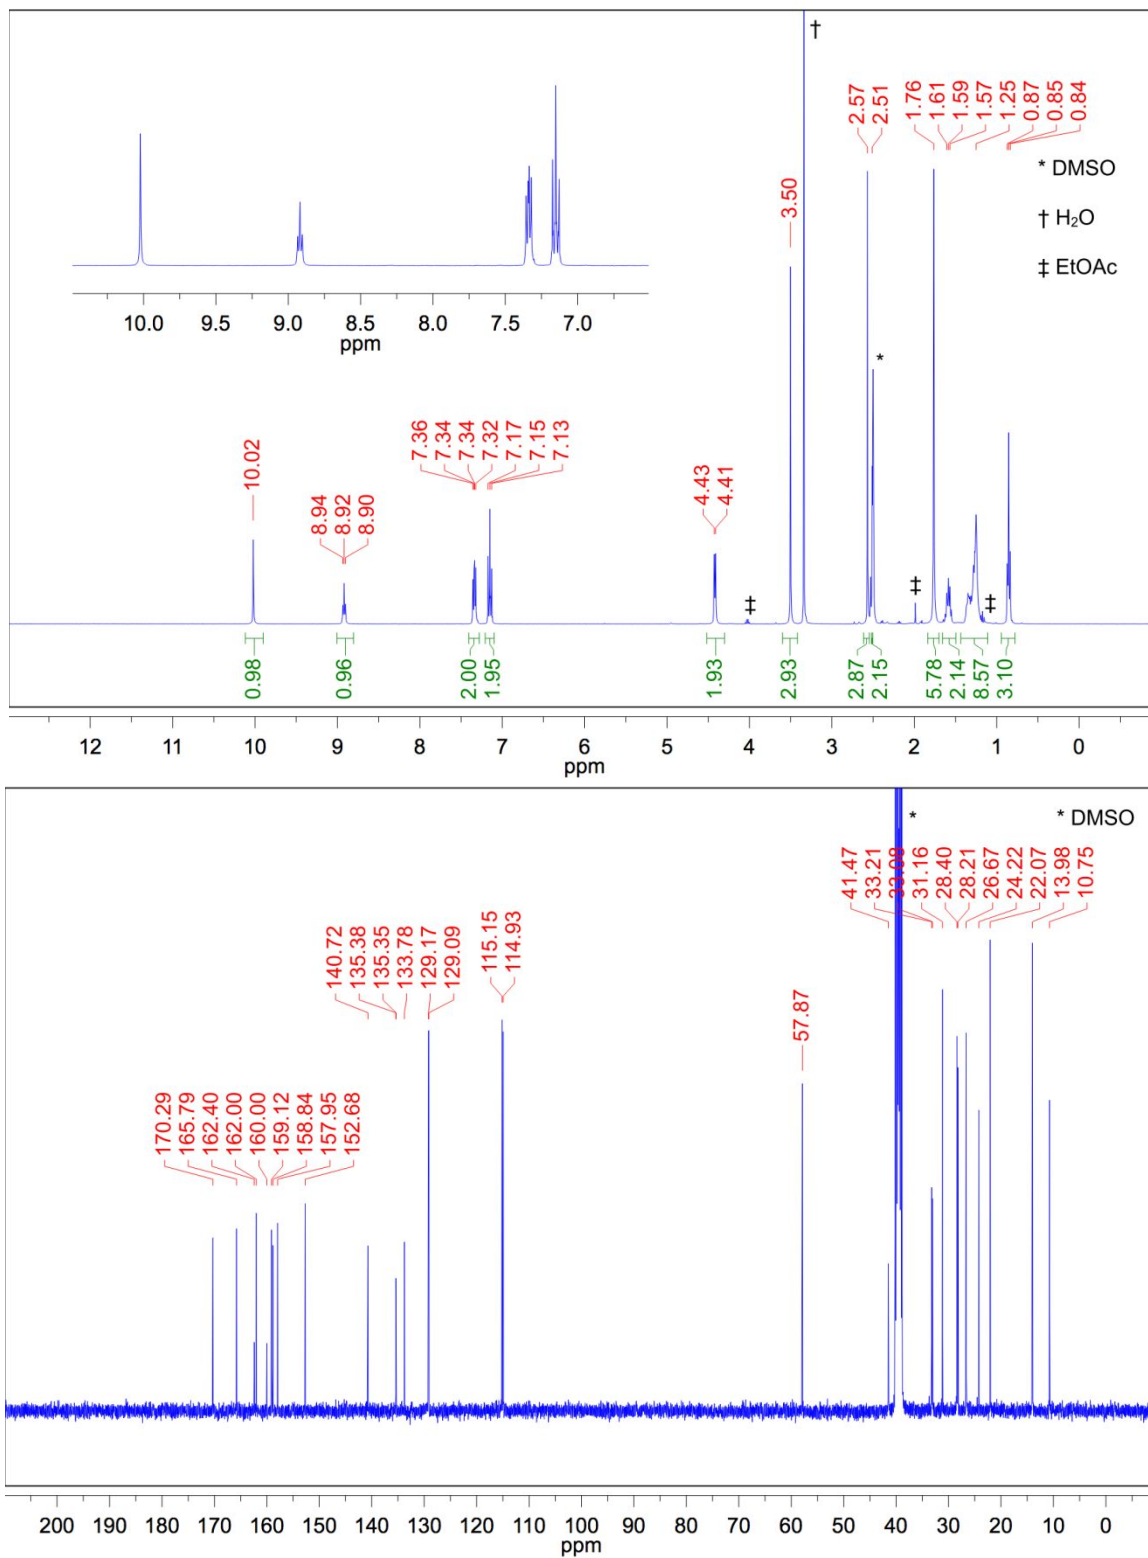

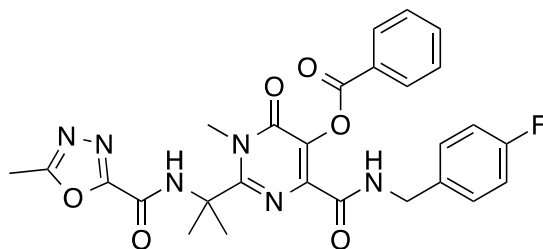

4

Chemical Formula:  $C_{27}H_{25}FN_6O_6$

Exact Mass: 548.18

Molecular Weight: 548.53

**5-(Benzoyloxy)-N-[(4-fluorophenyl)methyl]-1,6-dihydro-1-methyl-2-[(1-methyl-1-[(5-methyl-1,3,4-oxadiazol-2-yl)carbonyl]amino)ethyl]-6-oxo-4-pyrimidinecarboxamide (4).**

Benzoyl chloride (0.157 mL, 1.35 mmol, 1.5 equiv) was added dropwise to a solution of raltegravir (0.400 g, 0.90 mmol) and triethylamine (0.353 mL, 2.53 mmol, 2.8 equiv) in dichloromethane (6.0 mL) and stirred at room temperature. After 3 h the reaction was diluted with dichloromethane (25 mL), washed with saturated aq.  $NaHCO_3$  (1 x 45 mL) and brine (1 x 45 mL), dried ( $Na_2SO_4$ ) and concentrated under reduced pressure. The resulting residue was purified by column chromatography on silica gel (ethyl acetate) to provide compound **4** as a white solid (0.316 mg, 64.0 % yield).  $R_f$  = 0.39 (ethyl acetate).  $^1H$  NMR (400 MHz,  $DMSO-d_6$ )  $\delta$  10.06 (s, 1H), 9.00 (t,  $J$  = 6.4 Hz, 1H), 8.05 (d,  $J$  = 7.0 Hz, 2H), 7.76 (t,  $J$  = 7.5 Hz, 1H), 7.61 (t,  $J$  = 7.7 Hz, 1H), 7.30 (dd,  $J$  = 8.7, 5.6 Hz, 2H), 7.09 (t,  $J$  = 8.9 Hz, 2H), 4.39 (d,  $J$  = 6.3 Hz, 2H), 3.54 (s, 3H), 2.58 (s, 3H), 1.80 (s, 6H).  $^{13}C$  NMR (101 MHz,  $DMSO-d_6$ )  $\delta$  165.8, 163.2, 161.9, 161.2 (d,  $J$  = 242.2 Hz), 159.5, 158.9, 158.0, 152.8, 141.0, 135.3 (d,  $J$  = 3.0 Hz), 134.2, 134.0, 130.0, 129.1 (d,  $J$  = 8.3 Hz), 129.0, 128.4, 115.0 (d,  $J$  = 21.3 Hz), 58.0, 41.5, 33.3, 26.7, 10.8.  $^{19}F$  NMR (376 MHz, DMSO)  $\delta$  -116.1. MS  $m/z$  571.6 ( $M + Na$ ) $^+$ .

**Figure S9.** Electrospray mass spectrum of **4** acquired in positive-ion mode.

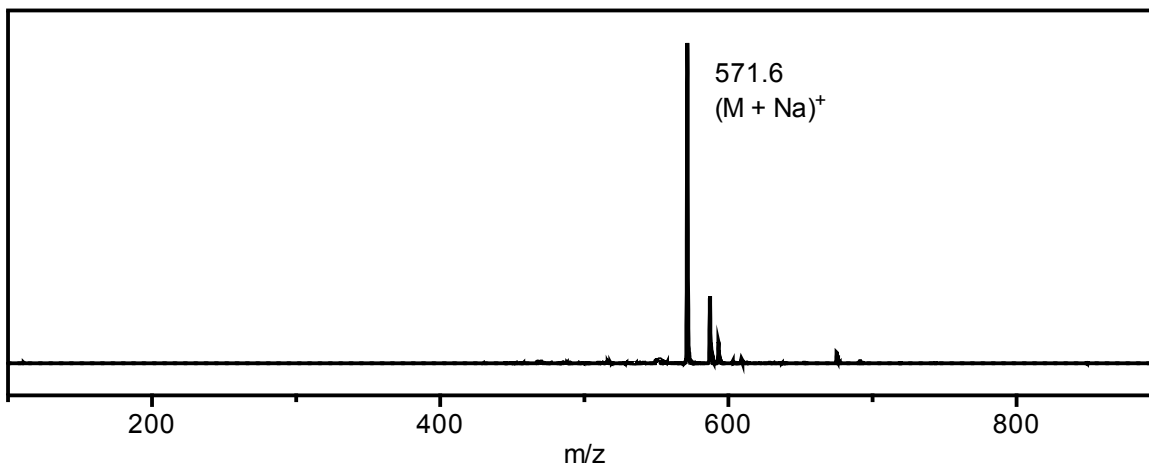

**Figure S10.**  $^1\text{H}$  NMR (400 MHz) and  $^{13}\text{C}$  NMR (101 MHz) of **4** in  $\text{DMSO}-d_6$ .

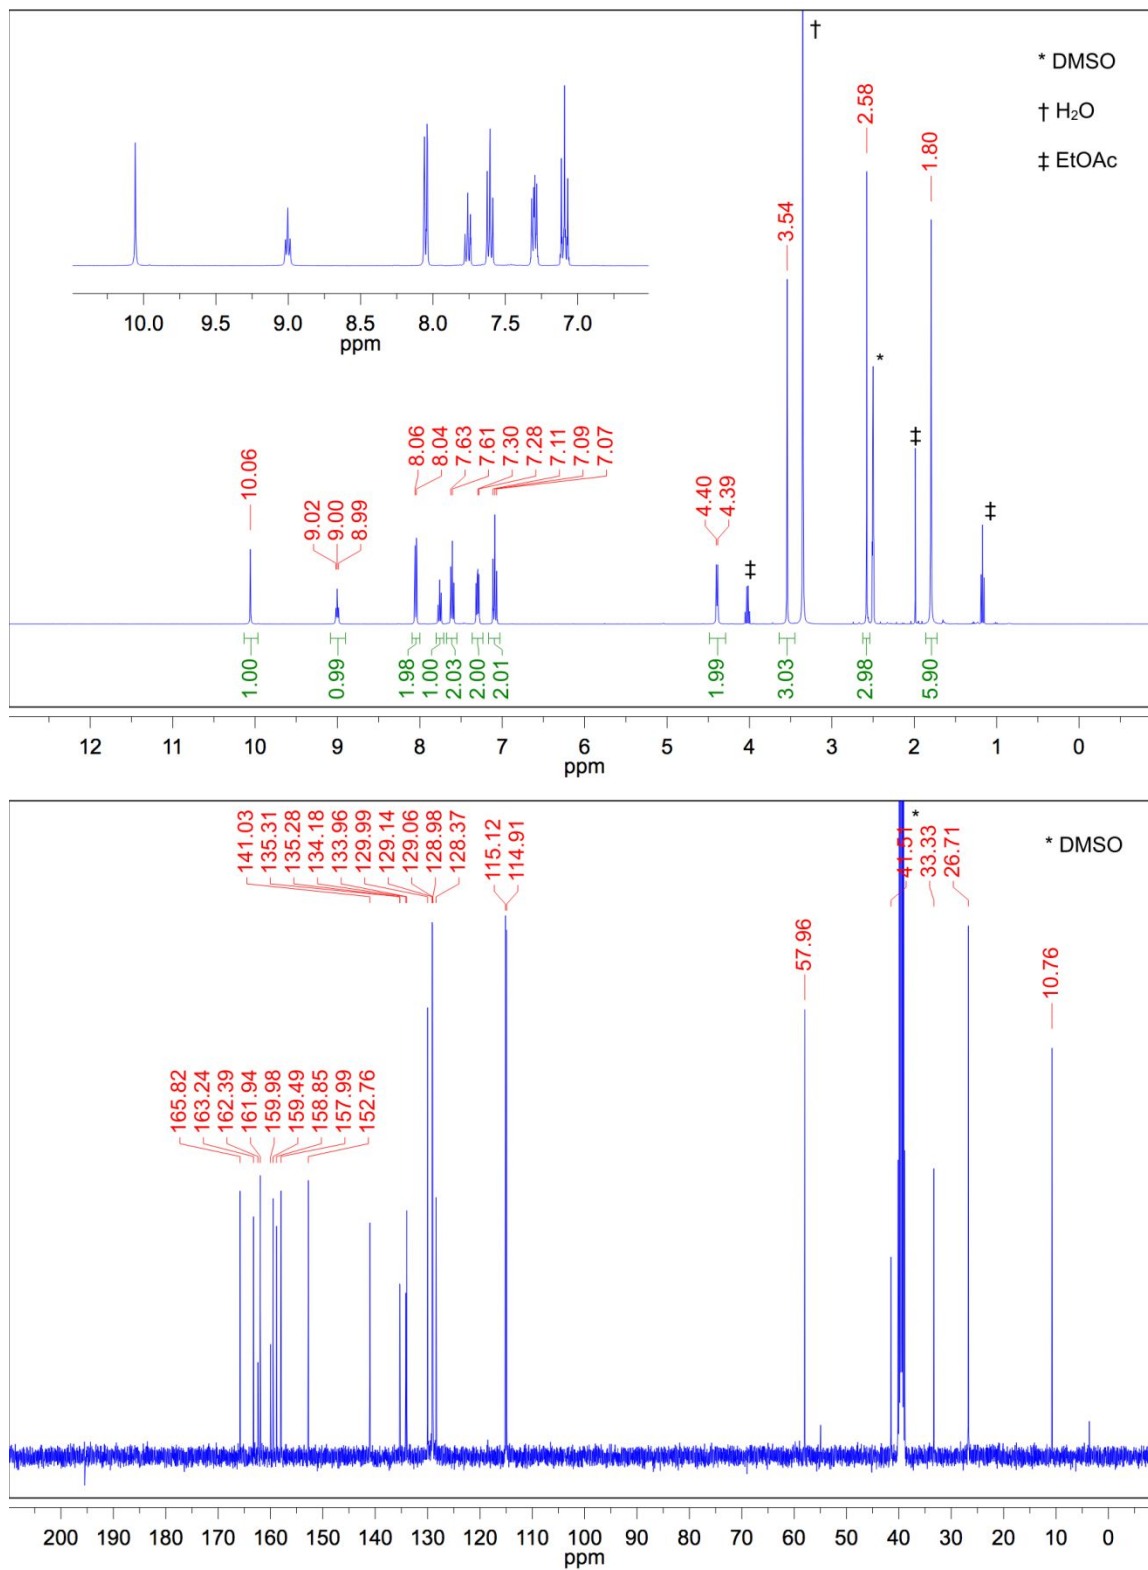

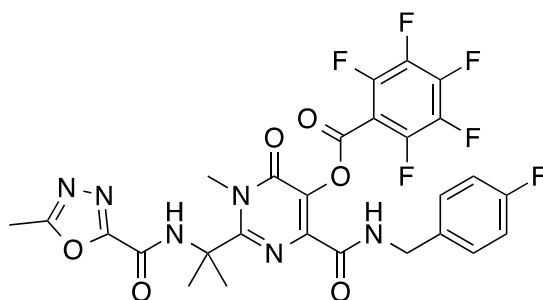

**5**

Chemical Formula:  $C_{27}H_{20}F_6N_6O_6$

Exact Mass: 638.13

Molecular Weight: 638.48

**5-(Pentafluorobenzoyloxy)-*N*-[(4-fluorophenyl)methyl]-1,6-dihydro-1-methyl-2-(1-methyl-1-[[5-methyl-1,3,4-oxadiazol-2-yl]carbonyl]amino)ethyl)-6-oxo-4-pyrimidinecarboxamide (5).**

Pentafluorobenzoyl chloride (0.069 mL, 0.48 mmol, 1.1 equiv) was added dropwise to a solution of raltegravir (0.200 g, 0.45 mmol) and triethylamine (0.180 mL, 1.29 mmol, 2.9 equiv) in dichloromethane (3.0 mL) and stirred at room temperature. After 3 h the reaction was diluted with dichloromethane (25 mL), washed with saturated aq.  $NaHCO_3$  (1 x 45 mL) and brine (1 x 45 mL), dried ( $Na_2SO_4$ ) and concentrated under reduced pressure. The resulting residue was purified by column chromatography on silica gel (ethyl acetate) to provide compound **5** as a white solid (0.025 g, 8.6 % yield).  $R_f$  = 0.39 (ethyl acetate).  $^1H$  NMR (400 MHz,  $DMSO-d_6$ )  $\delta$  10.08 (s, 1H), 9.04 (t,  $J$  = 6.4 Hz, 1H), 7.33 (dd,  $J$  = 8.7, 5.5 Hz, 2H), 7.14 (t,  $J$  = 8.9 Hz, 2H), 4.42 (d,  $J$  = 6.3 Hz, 2H), 3.55 (s, 3H), 2.57 (s, 3H), 1.79 (s, 6H).  $^{13}C$  NMR (101 MHz,  $DMSO-d_6$ )  $\delta$  165.8, 161.6, 161.2 (d,  $J_{F,C}$  = 242.3 Hz), 160.3, 158.2, 157.9, 155.8, 152.7, 141.0, 135.2 (d,  $J_{F,C}$  = 3.0 Hz), 132.9, 129.1 (d,  $J_{F,C}$  = 8.1 Hz), 115.0 (d,  $J_{F,C}$  = 21.3 Hz), 58.0, 41.5, 33.4, 26.6, 10.7 (resonances from pentafluorobenzoyl group below limit of detection due to large  $^{19}F$ - $^{13}C$  couplings).  $^{19}F$  NMR (376 MHz,  $DMSO$ )  $\delta$  -116.0, -137.0, -146.3, -160.6. MS  $m/z$  661.3 ( $M + Na$ ) $^+$ .

**Figure S11.** Electrospray mass spectrum of **5** acquired in positive-ion mode.

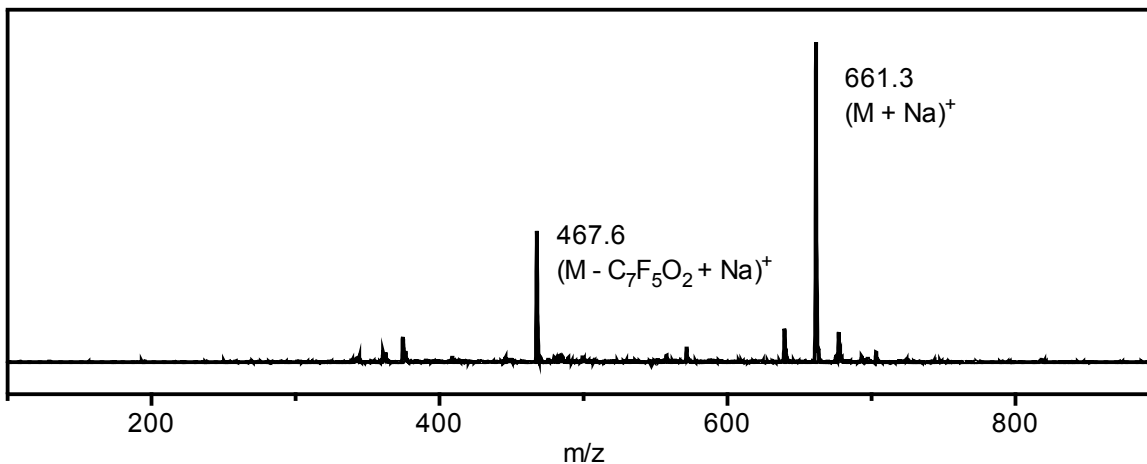

**Figure S12.**  $^1\text{H}$  NMR (400 MHz) and  $^{13}\text{C}$  NMR (101 MHz) of **5** in  $\text{DMSO}-d_6$ .

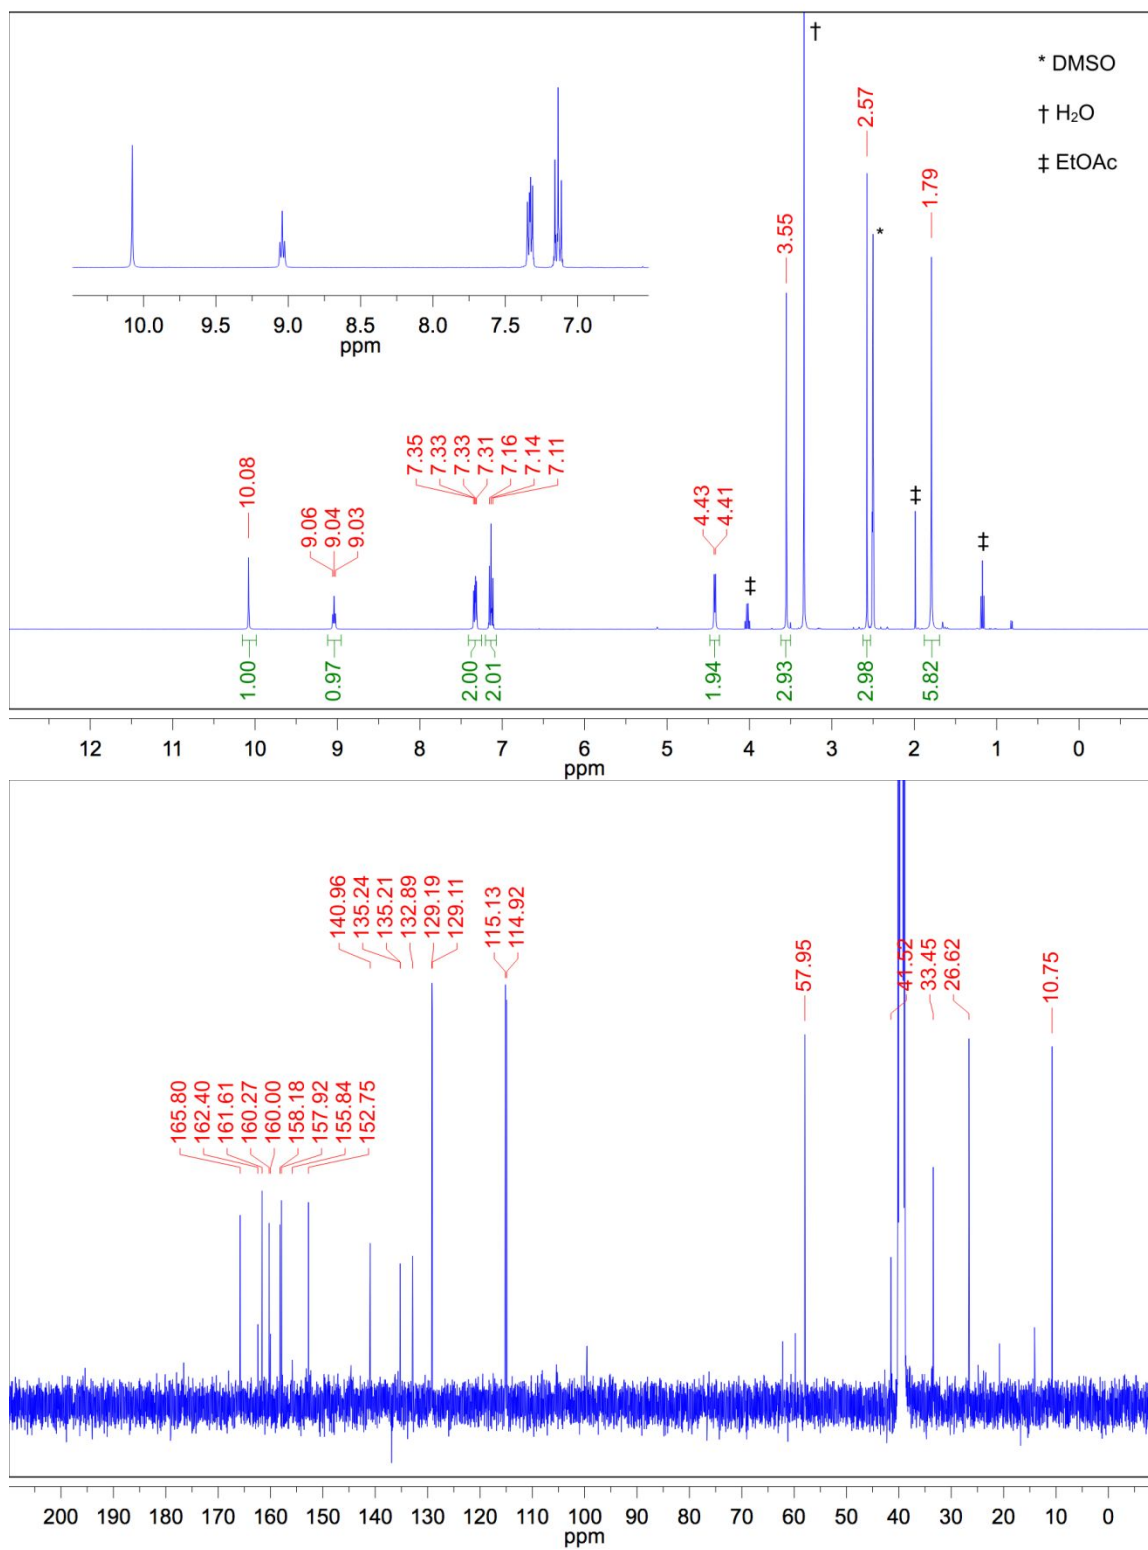

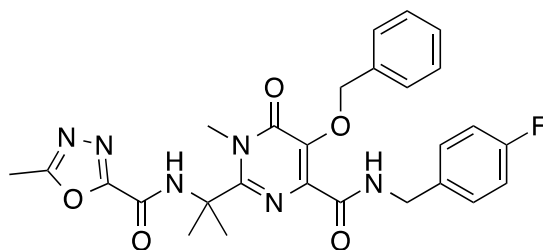

**6**

Chemical Formula:  $C_{27}H_{27}FN_6O_5$

Exact Mass: 534.20

Molecular Weight: 534.55

***N*-[*(4*-Fluorophenyl)methyl]-1,6-dihydro-1-methyl-2-[(1-methyl-1-[(5-methyl-1,3,4-oxadiazol-2-yl)carbonyl]amino)]ethyl)-6-oxo-5-(phenylmethoxy)-4-pyrimidinecarboxamide (**6**).** Potassium iodide (0.053 g, 0.32 mmol, 1.4 equiv), potassium carbonate (0.044 g, 0.32 mmol, 1.4 equiv) and 1,4,7,10,13,16-hexaoxacyclooctadecane (0.003 g, 0.01 mmol, 0.05 equiv) were dissolved in DMF (2.0 mL) and added to raltegravir (0.100 g, 0.23 mmol) under  $N_2$ . Following raltegravir dissolution benzyl chloride (0.037 mL, 0.32 mmol, 1.4 equiv) was added and the reaction was stirred at 60 °C. After 4 h the reaction was cooled to room temperature and diluted with ethyl acetate (20 mL), washed with water (3 x 20 mL) and brine (3 x 20 mL), dried ( $Na_2SO_4$ ) and concentrated under reduced pressure. The resulting residue was purified by column chromatography on silica gel (1:1 acetone:hexanes) to provide compound **6** as a white solid (0.044 g, 36.6 % yield).  $R_f$  = 0.18 (1:1 acetone:hexanes).  $^1H$  NMR (400 MHz,  $DMSO-d_6$ )  $\delta$  9.94 (s, 1H), 8.86 (t,  $J$  = 6.2 Hz, 1H), 7.43 (dd,  $J$  = 7.7, 1.8 Hz, 2H), 7.39 – 7.30 (m, 5H), 7.08 (t,  $J$  = 8.9 Hz, 2H), 5.08 (s, 2H), 4.43 (d,  $J$  = 6.2 Hz, 2H), 3.52 (s, 3H), 2.57 (s, 3H), 1.73 (s, 6H).  $^{13}C$  NMR (101 MHz,  $DMSO-d_6$ )  $\delta$  165.8, 163.7, 161.1 (d,  $J_{FC}$  = 242.1 Hz), 160.2, 158.0, 156.9, 152.6, 142.7, 139.7, 137.0, 135.4 (d,  $J_{FC}$  = 3.0 Hz), 129.1 (d,  $J_{FC}$  = 8.1 Hz), 128.2, 128.1, 128.0, 115.0 (d,  $J_{FC}$  = 21.3 Hz), 73.4, 57.7, 41.4, 32.8, 26.8, 10.7.  $^{19}F$  NMR (376 MHz,  $DMSO$ )  $\delta$  -116.2. MS  $m/z$  557.6 ( $M + Na$ ) $^+$ .

**Figure S13.** Electrospray mass spectrum of **6** acquired in positive-ion mode.

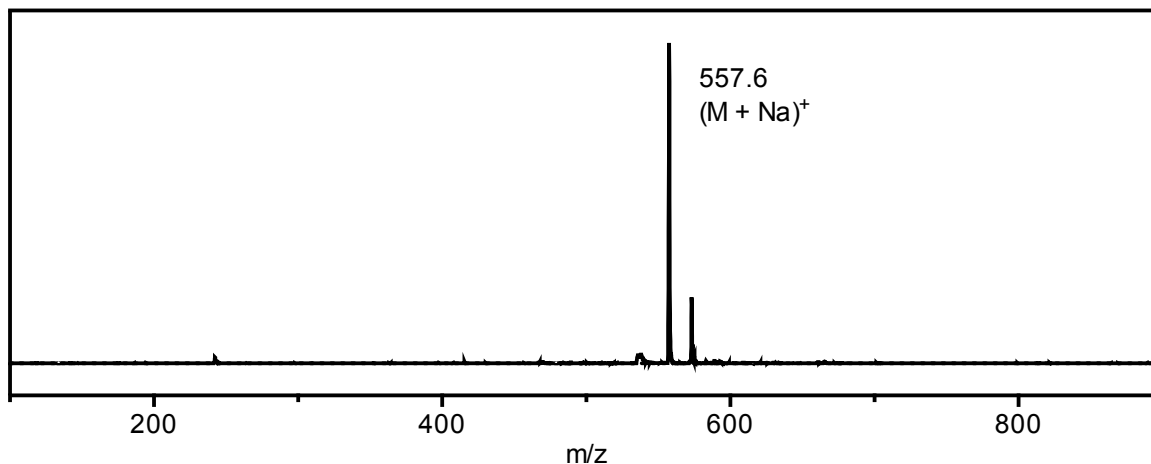



**Figure S14.**  $^1\text{H}$  NMR (400 MHz) and  $^{13}\text{C}$  NMR (101 MHz) of **6** in  $\text{DMSO-}d_6$ .

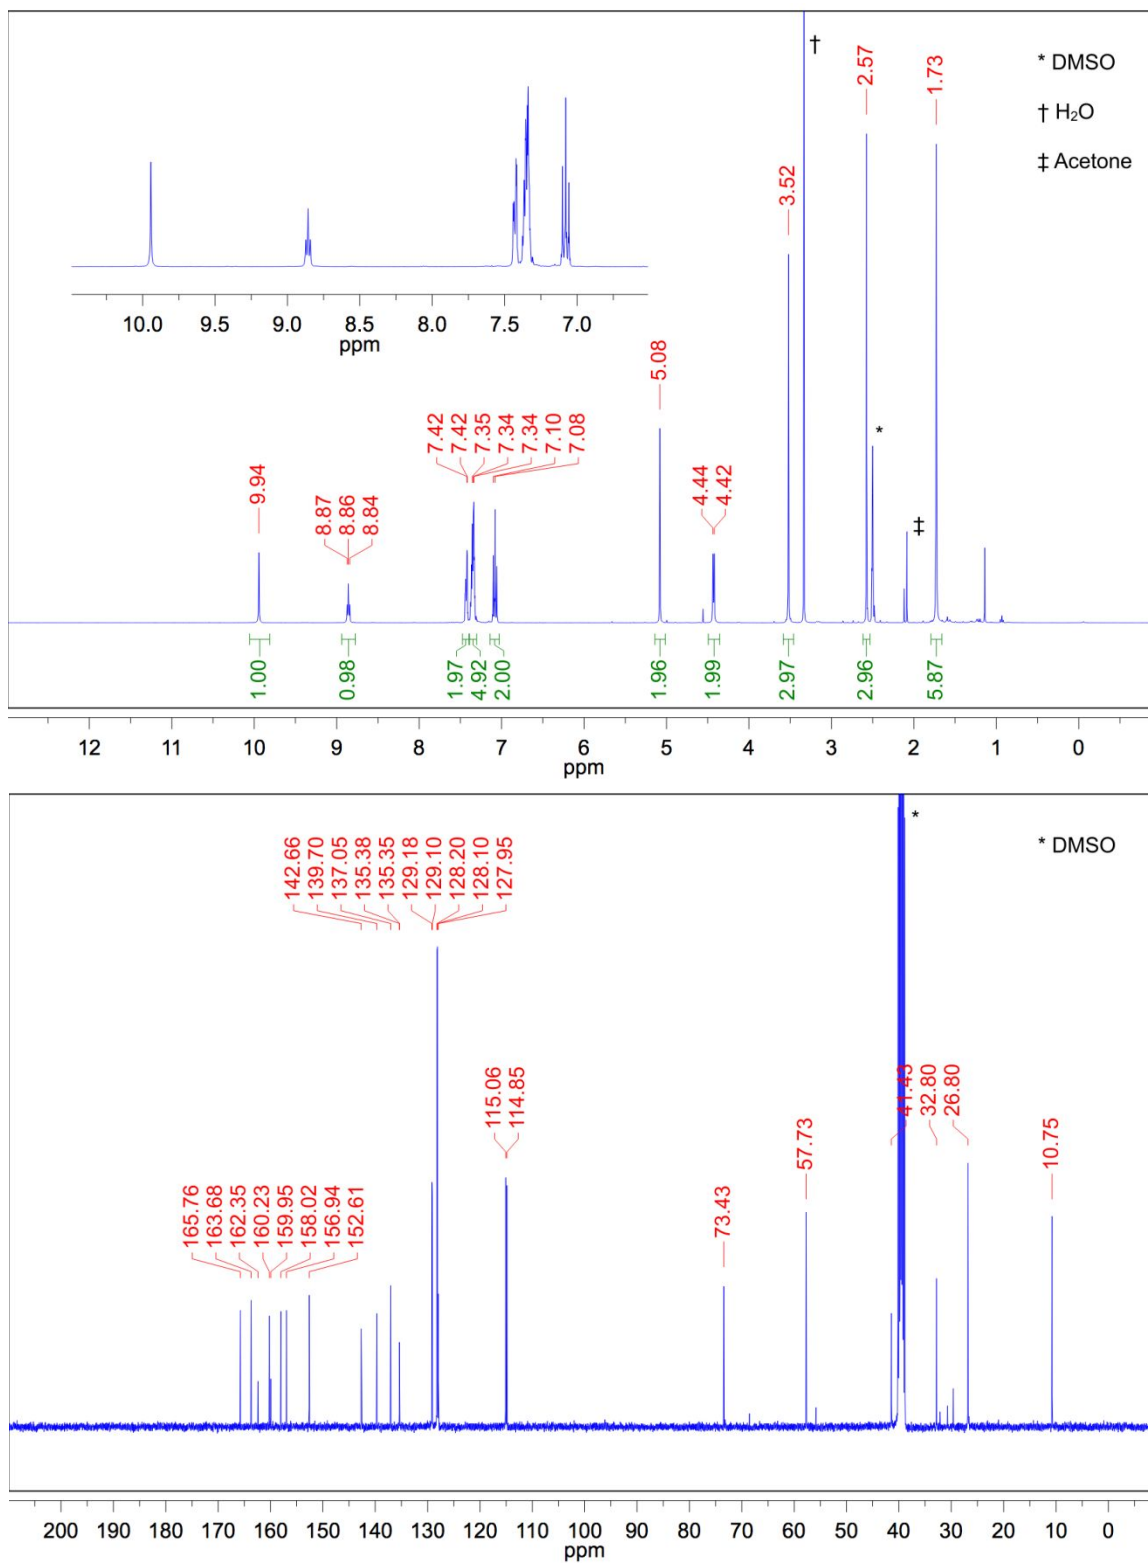

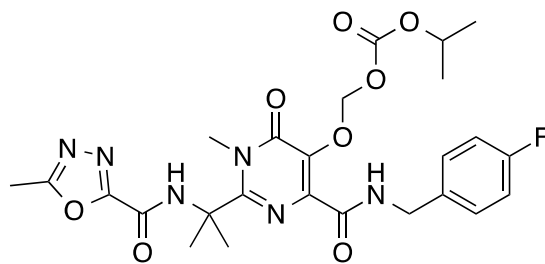

7

Chemical Formula:  $C_{25}H_{29}FN_6O_8$

Exact Mass: 560.20

Molecular Weight: 560.54

**{[4-({[(4-Fluorophenyl)methyl]amino}]carbonyl)-1,6-dihydro-1-methyl-2-(1-methyl-1-[(5-methyl-1,3,4-oxadiazol-2-yl)carbonyl]amino)ethyl)-6-oxo-5-pyrimidinyl]oxy}methyl isopropyl carbonate (7).** Potassium iodide (0.246 g, 1.48 mmol, 1.3 equiv), potassium carbonate (0.223 g, 1.61 mmol, 1.4 equiv) and 1,4,7,10,13,16-hexaoxacyclooctadecane (0.014 g, 0.05 mmol, 0.05 equiv) were dissolved in DMF (10.0 mL) and added to raltegravir (0.500 g, 1.13 mmol) under  $N_2$ . Following raltegravir dissolution chloromethyl isopropyl carbonate (0.251 mL, 1.88 mmol, 1.7 equiv) was added and the reaction was stirred at 60 °C. After 4 h the reaction was cooled to room temperature and diluted with ethyl acetate (100 mL), washed with water (3 x 100 mL) and brine (3 x 100 mL), dried ( $Na_2SO_4$ ) and concentrated under reduced pressure. The resulting residue was purified by column chromatography on silica gel (1:1 acetone:hexanes) to provide compound **7** as a white solid (0.275 g, 54.9 % yield).  $R_f$  = 0.27 (1:1 acetone:hexanes).  $^1H$  NMR (400 MHz,  $DMSO-d_6$ )  $\delta$  9.95 (s, 1H), 8.78 (t,  $J$  = 6.3 Hz, 1H), 7.37 (dd,  $J$  = 8.3, 5.6 Hz, 2H), 7.15 (t,  $J$  = 8.9 Hz, 2H), 5.66 (s, 2H), 4.76 (hept,  $J$  = 6.3 Hz, 1H), 4.41 (d,  $J$  = 6.2 Hz, 2H), 3.49 (s, 3H), 2.57 (s, 3H), 1.73 (s, 6H), 1.20 (d,  $J$  = 6.3 Hz, 6H).  $^{13}C$  NMR (101 MHz,  $DMSO-d_6$ )  $\delta$  165.7, 162.7, 161.2 (d,  $J$  = 242.1 Hz), 159.9, 158.0, 157.6, 153.1, 152.6, 141.7, 138.0, 135.4 (d,  $J$  = 2.9 Hz), 129.1 (d,  $J$  = 8.1 Hz), 115.0 (d,  $J$  = 21.2 Hz), 89.5, 72.0, 57.8, 41.4, 32.9, 26.7, 21.4, 10.7.  $^{19}F$  NMR (376 MHz,  $DMSO$ )  $\delta$  -116.2. MS  $m/z$  583.5 ( $M + Na$ ) $^+$ .

**Figure S15.** Electrospray mass spectrum of **7** acquired in positive-ion mode.

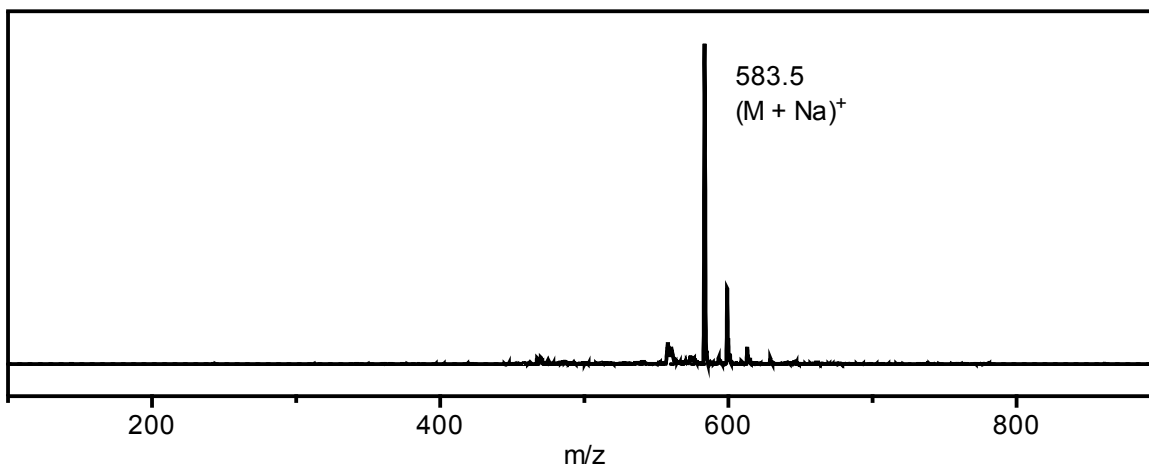

**Figure S16.**  $^1\text{H}$  NMR (400 MHz) and  $^{13}\text{C}$  NMR (101 MHz) of **7** in  $\text{DMSO-}d_6$ .

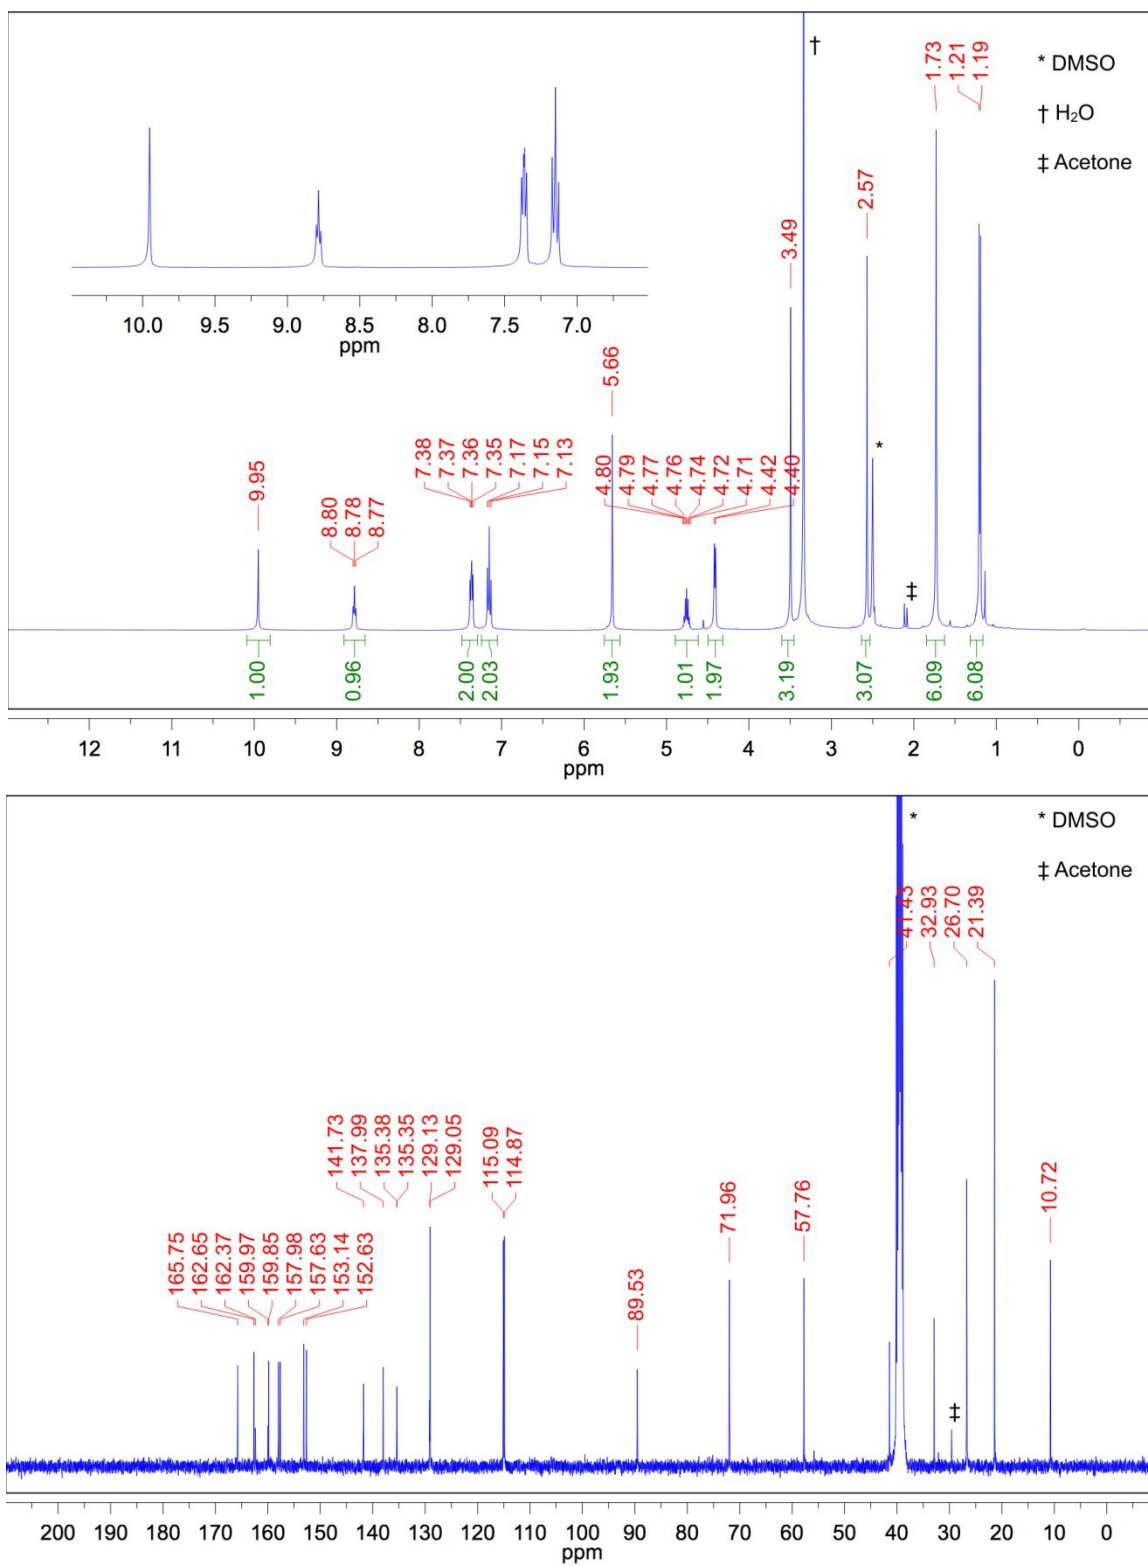

Supplement: Supplementary file 1 [file 16335557]
